# Supplementary material
Source: PubMed Central journal article supplement (PMC365738)
Supplement: pnas_101_9_3023__5.pdf [file pnas_101_9_3023__5.pdf]

a.

Section

1

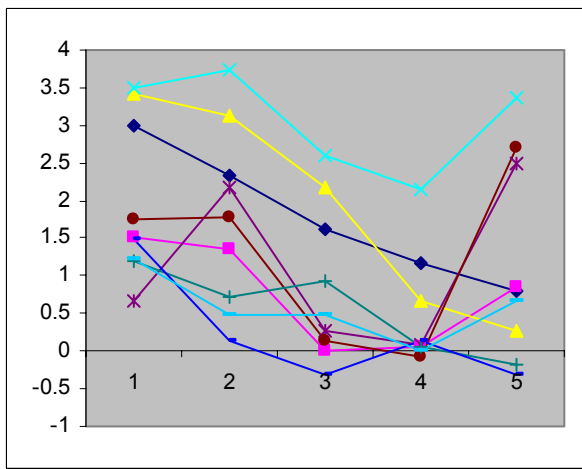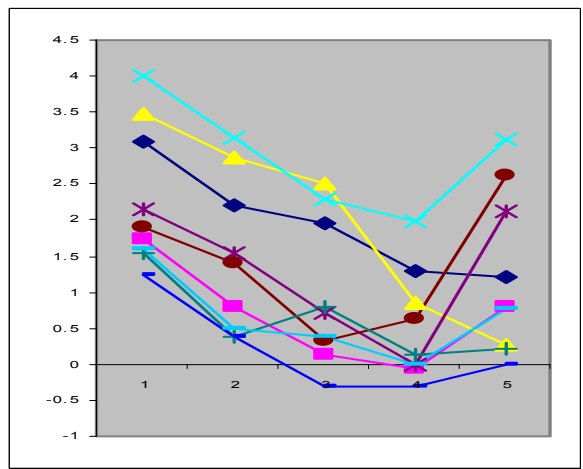

2

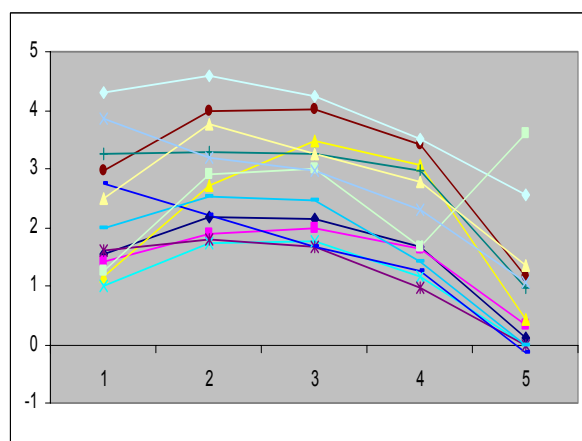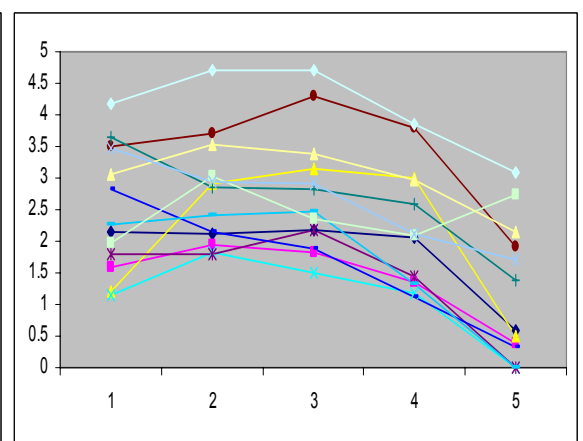

3

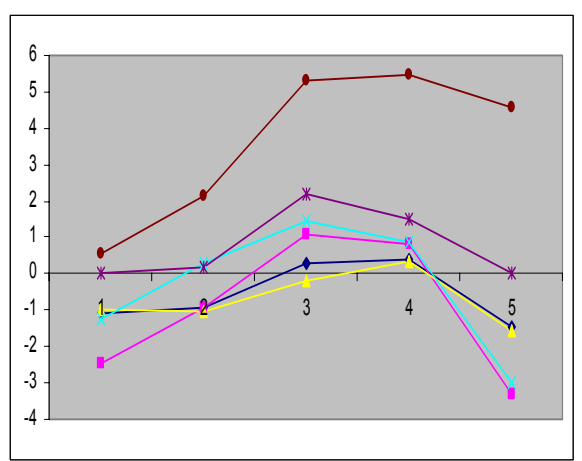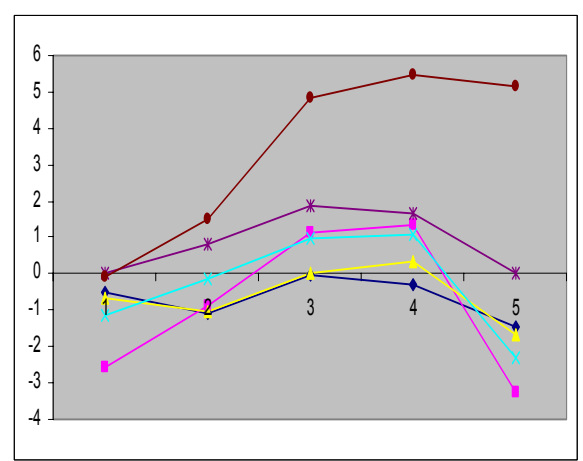

Folds of induction (log2)

Th1

Th2

b.

Folds of induction (log2)

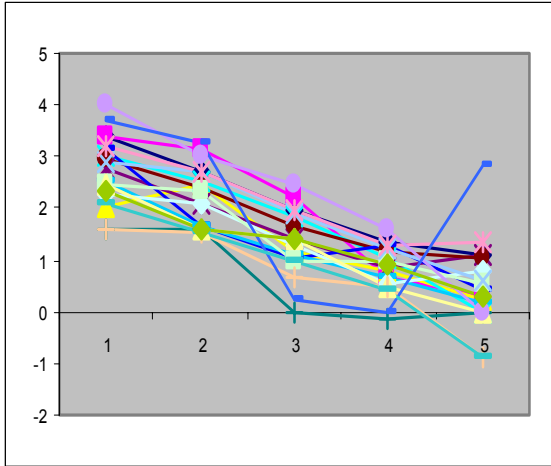

Th1

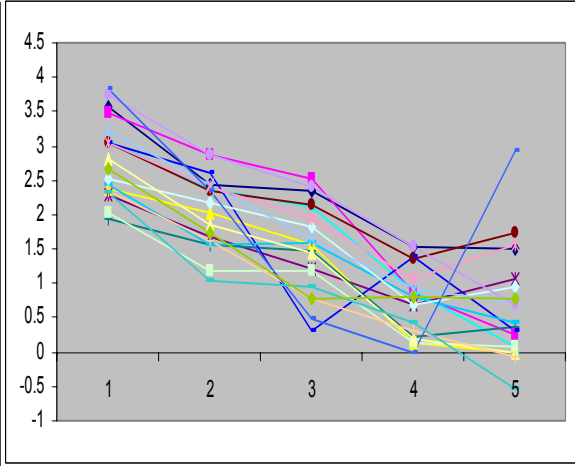

Th2

C.

Section

Folds of induction (log2)

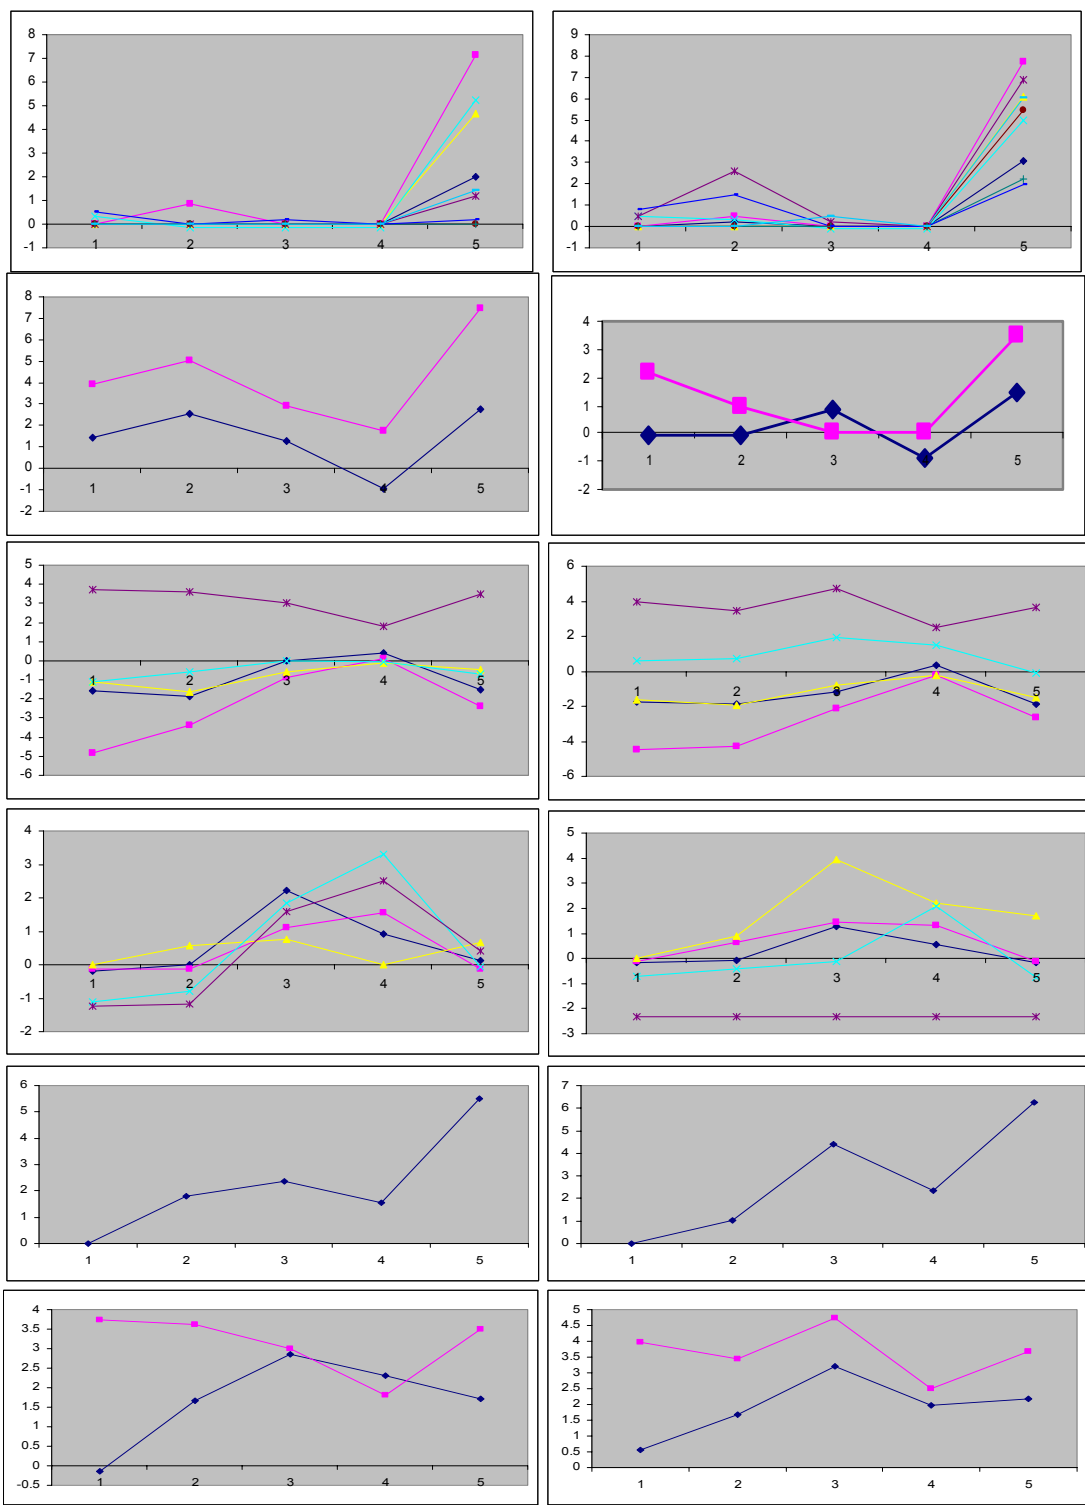

Th1

Th2

d.

Folds of induction (log2)

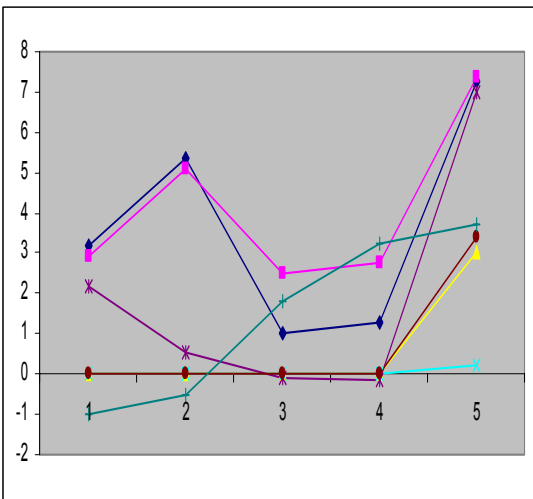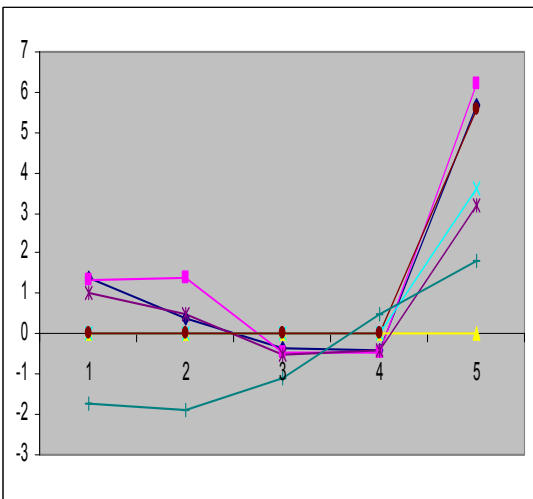

11

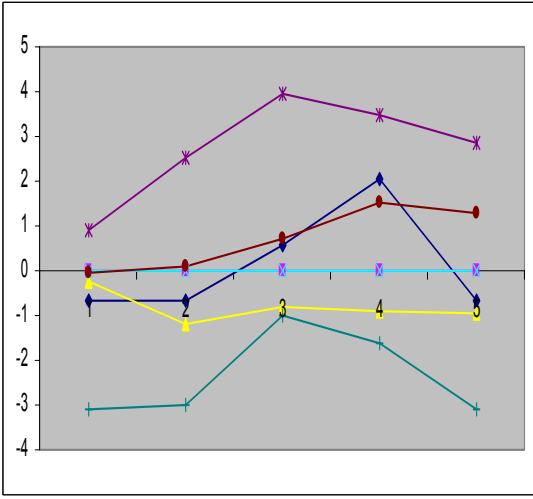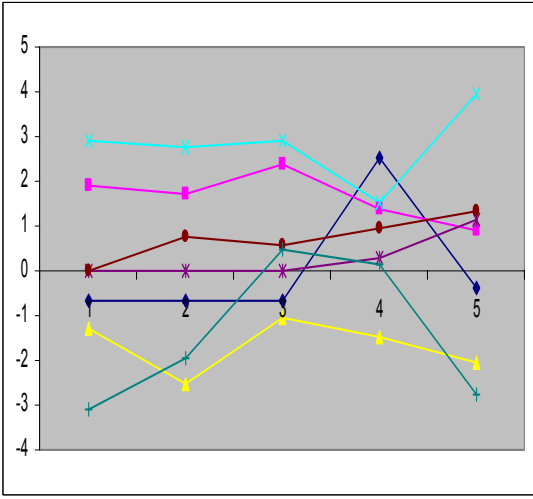

12

Th1

Th2

e.

Section

Folds of induction (log2)

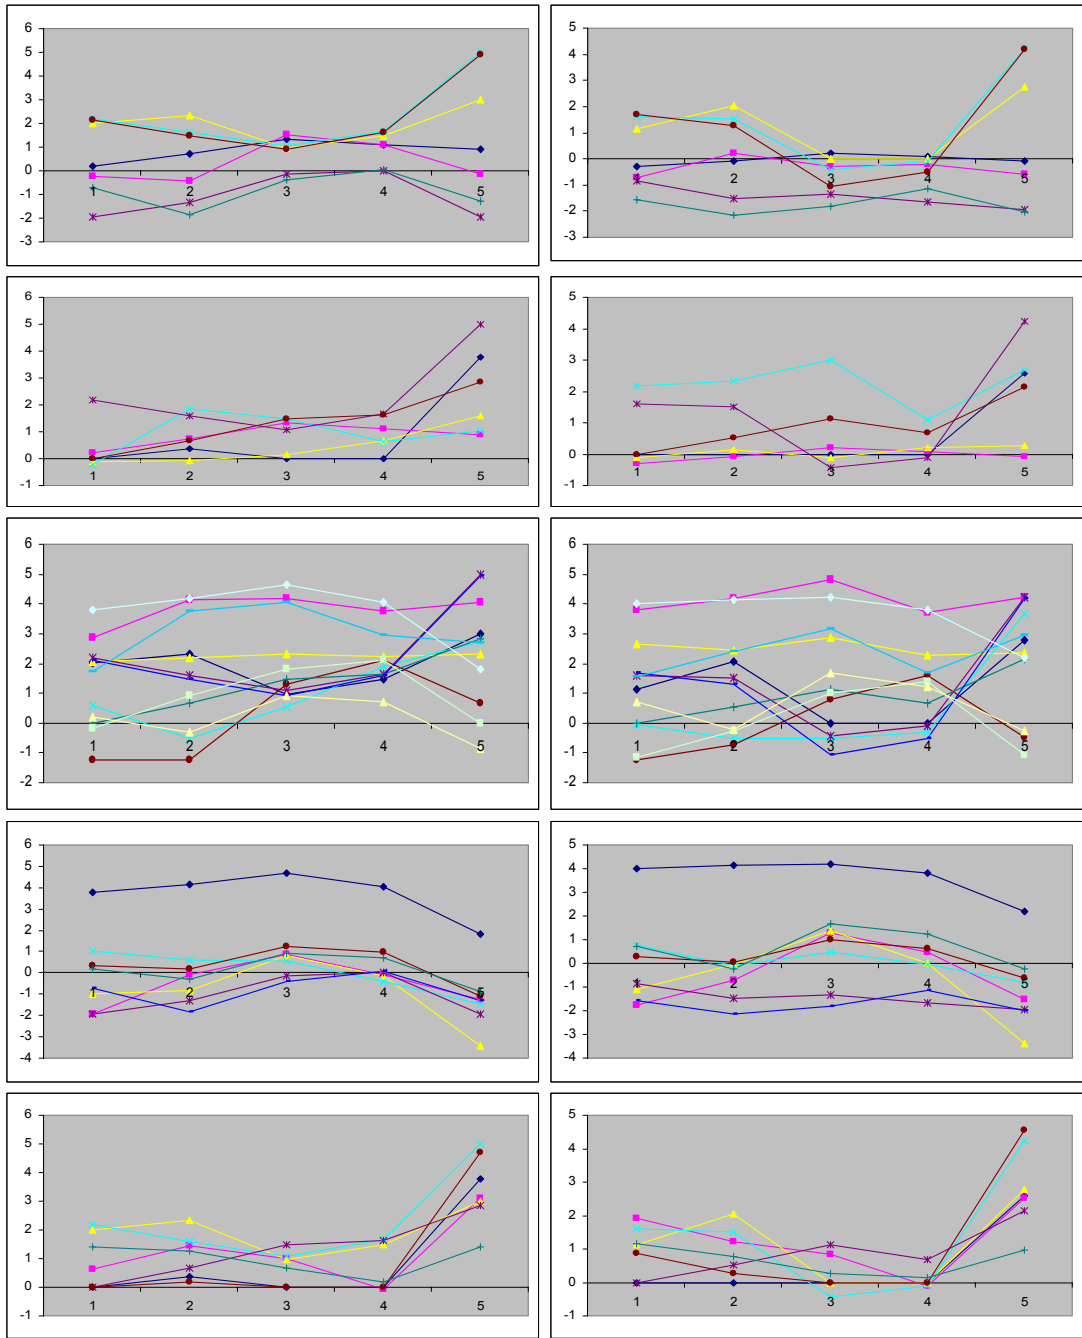

Th1

Th2
