# Supplementary material
Source: PubMed Central journal article supplement (PMC365738)

fold change vs. naive (log10)

**Gata-3**

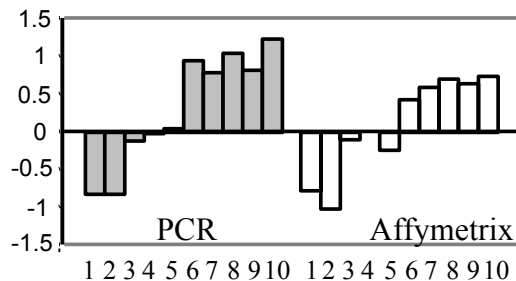

**CCR4**

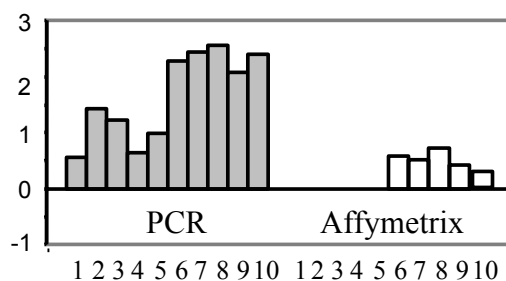

**AKR1C13P**

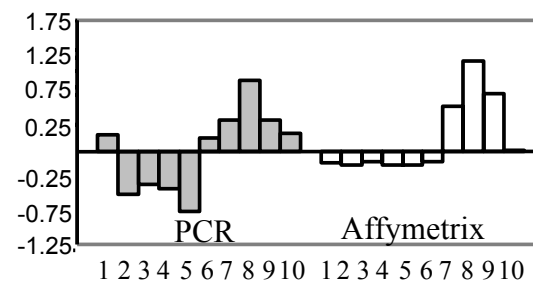

**PD-1**

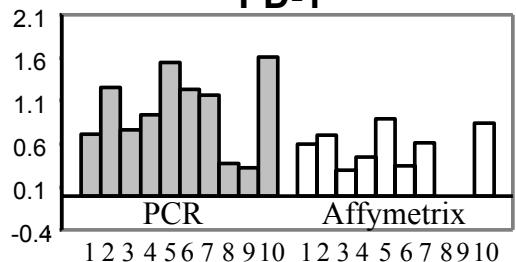

**IL-10**

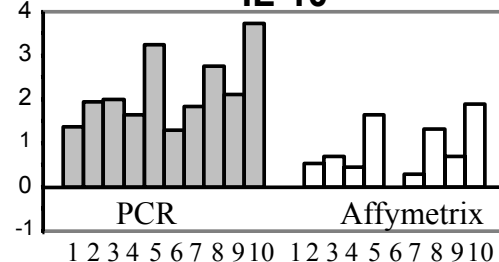

**Hlx**

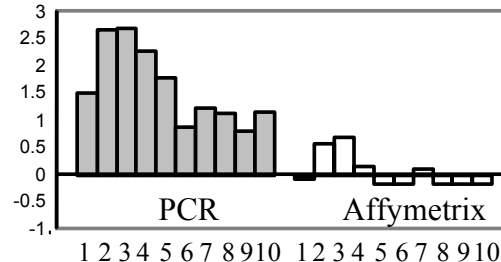

**CTLA-4**

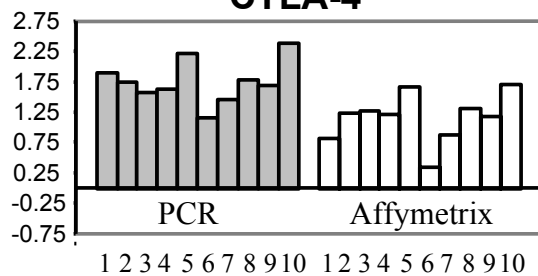

**bKLF**

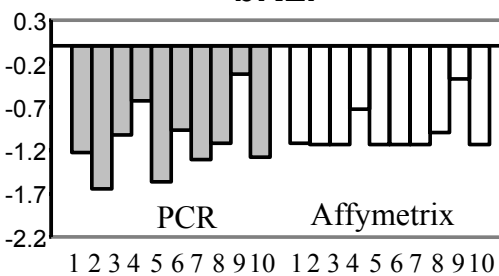

**EPAS**

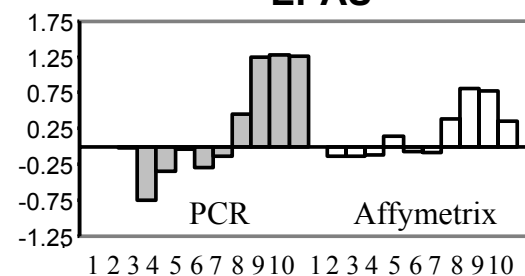

**KLF7**

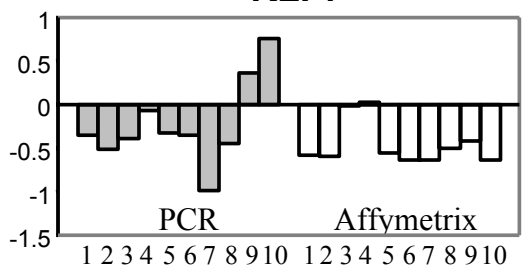

**MRP8**

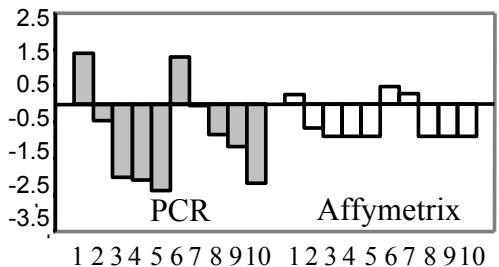

**CDK4**

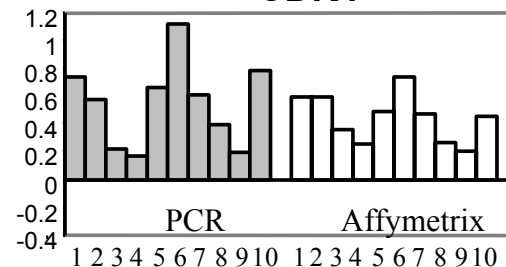

Supplement: pnas_101_9_3023__2.pdf [file pnas_101_9_3023__2.pdf]

a.

Folds of induction (log2)

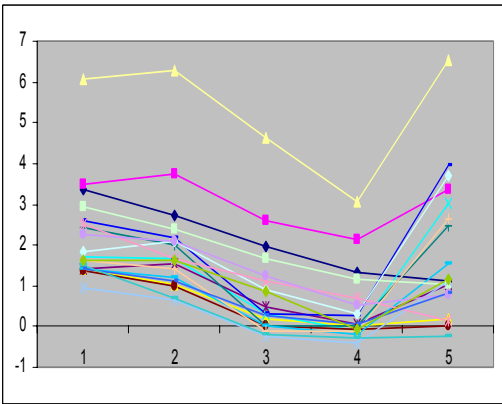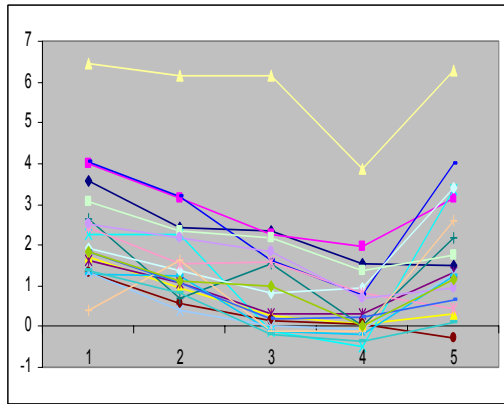

18

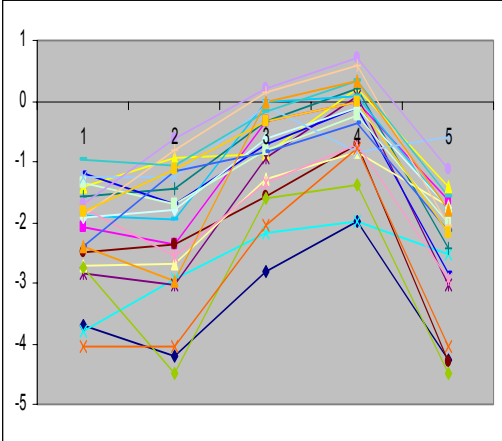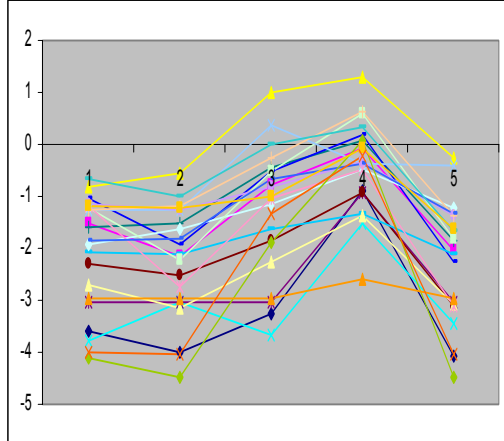

19

Th1

Th2

b.

Folds of induction (log2)

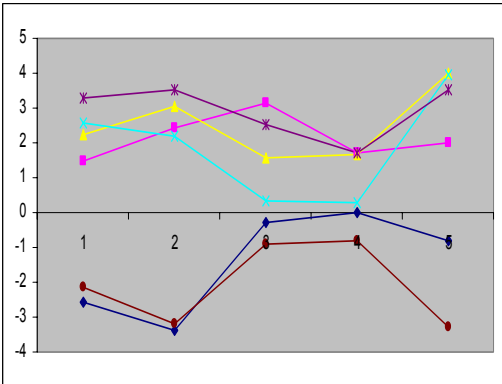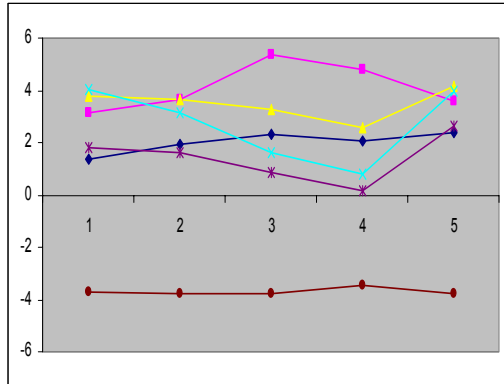

20

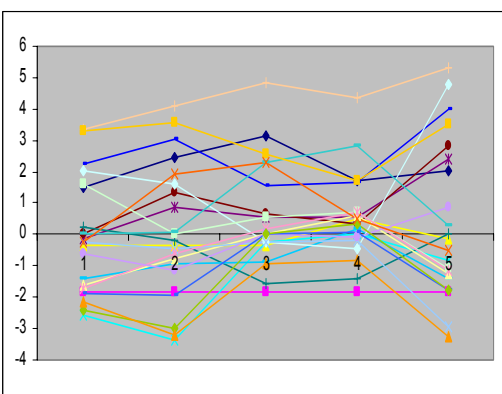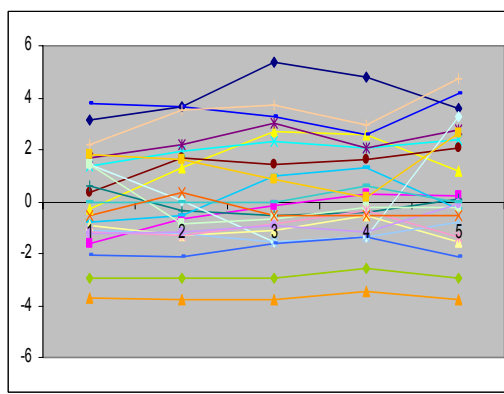

21

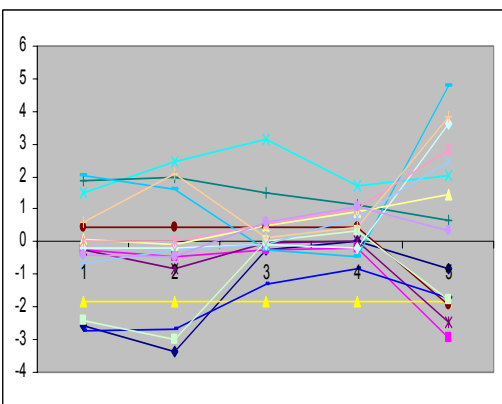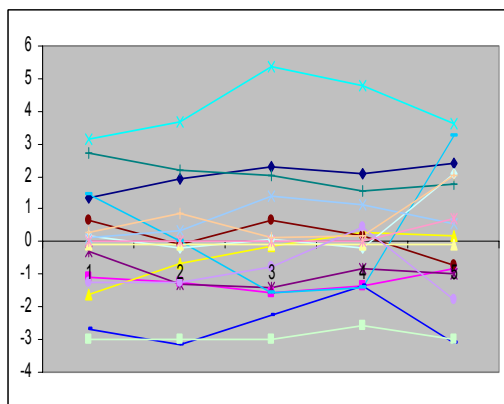

22

Th1

Th2

23

24

25

26

27

28

29

30

31

32

33

Folds of induction (log2)

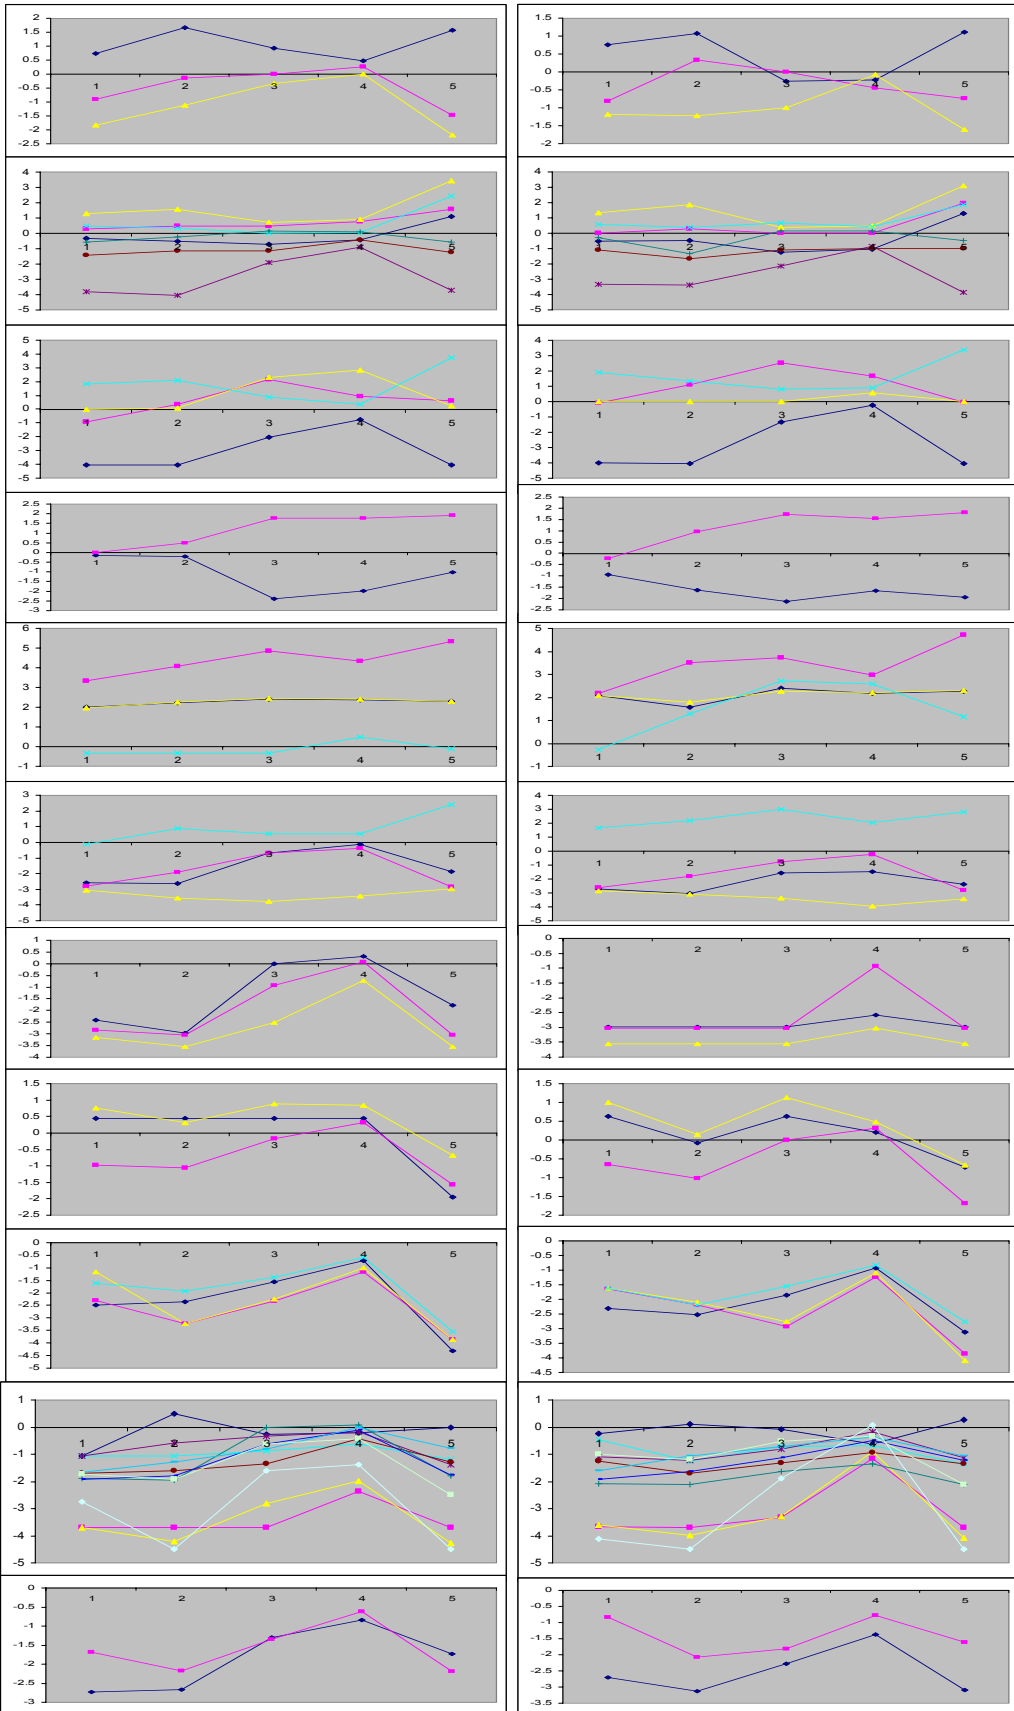

Th1

Th2

Supplement: pnas_101_9_3023__7.pdf [file pnas_101_9_3023__7.pdf]
